# Supplementary material for: Potentiation of excitatory synaptic transmission ameliorates aggression in mice with Stxbp1 haploinsufficiency
Source: Oxford University Press journal article supplement (doi:10.1093/hmg/ddx379), 2017-10-10
Supplement: ddx379_supplementary_figures_and_movie_captions.pdf [file ddx379_supplementary_figures_and_movie_captions.pdf]

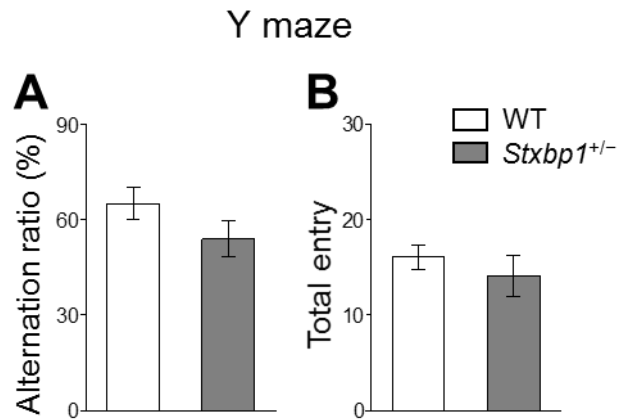

**Supplementary Figure S1. *Stxbp1*<sup>+/-</sup> mice retained normal short-term memory on the Y-maze test**

(A) Alternation rate during the test (10 min). Alternation rate is the frequency of entry into another arm different (“correct response”). WT (n = 10) vs. *Stxbp1*<sup>+/-</sup> mice (n = 9), male, 9 months old, *t*-test,  $t_{17} = 1.458$ ,  $p = 0.1632$ .

(B) The number of total entries into the arms. *t*-test,  $t_{17} = 0.8217$ ,  $p = 0.4226$ .

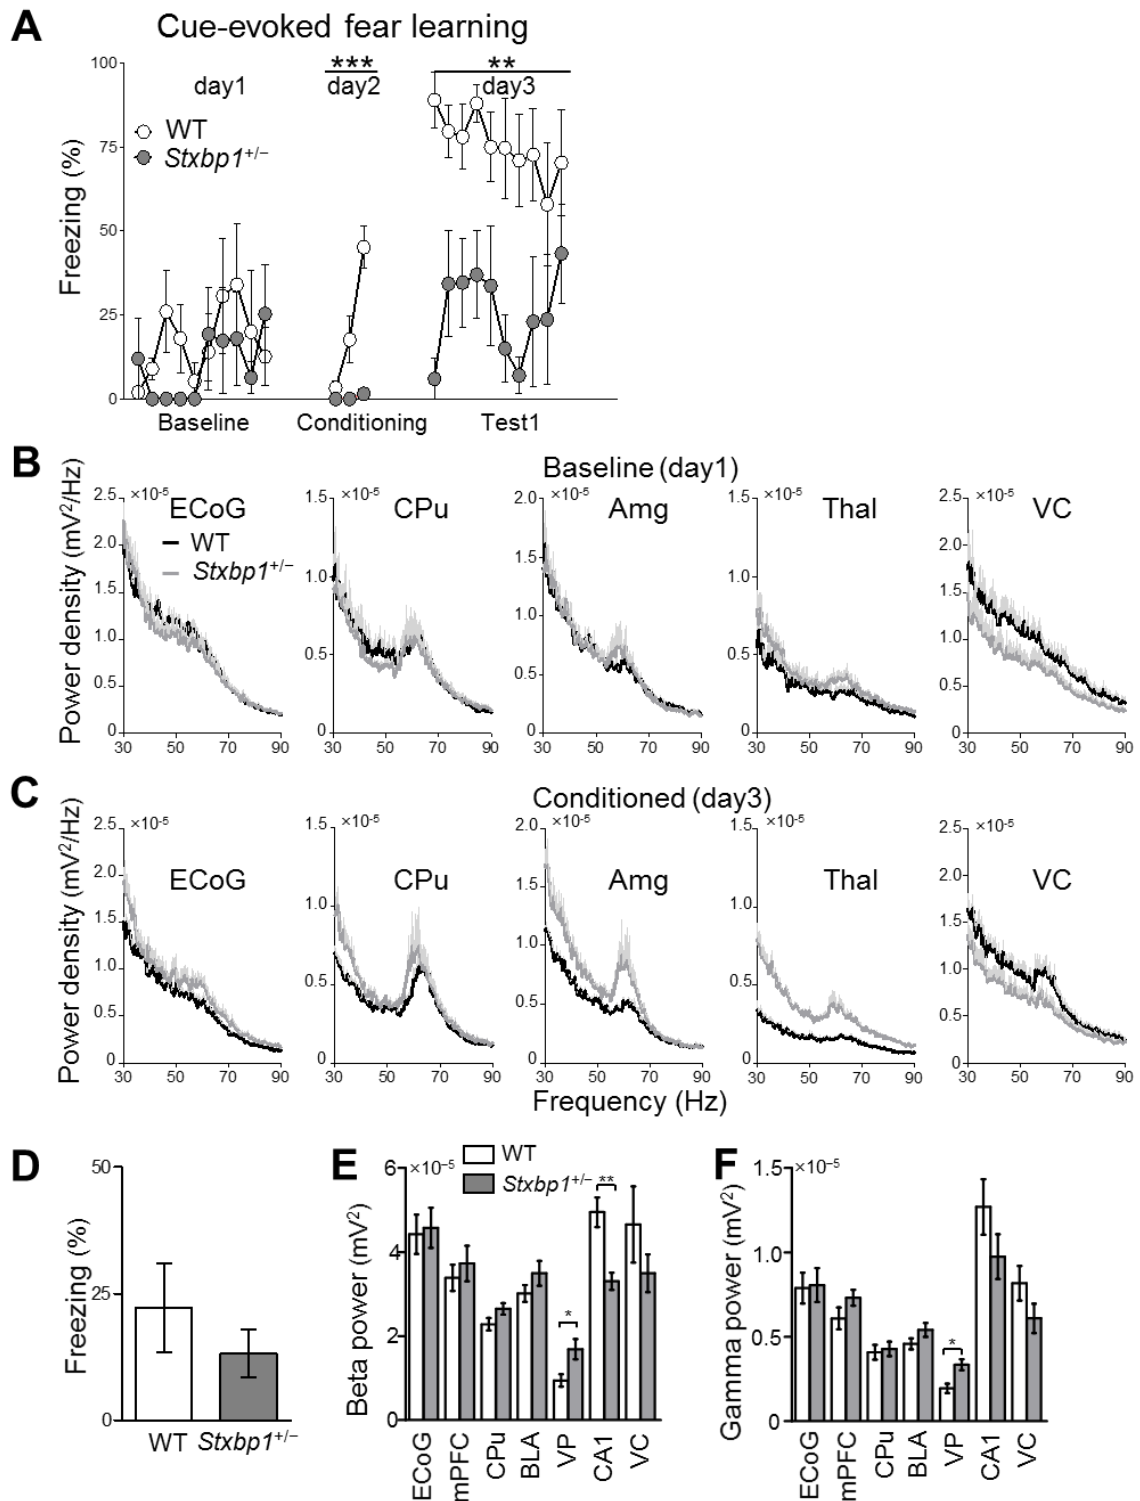

**Supplementary Figure S2. Impaired fear conditioning of naive *Stxbp1*<sup>+/-</sup> mice and their LFP recordings**

(A) Time course of freezing responses (30-sec bin) in the tone-evoked fear conditioning concurrent with LFP recordings (see Figure 3). Two-way repeated measures ANOVA, WT ( $n = 5$ ) vs. *Stxbp1*<sup>+/-</sup> ( $n = 5$ ), baseline:  $F_{1,72} = 0.72$ ,  $p = 0.4207$ ; conditioning:  $F_{1,16} =$

56.87, \*\*\* $p < 0.0001$ ; test1:  $F_{1,72} = 14.83$ , \*\* $p = 0.0049$ .

**(B)** Power spectra of brain regions before fear conditioning (baseline, day1) in WT (n = 5) and *Stxbp1*<sup>+/-</sup> (n = 5) mice (5 months of age).

**(C)** Power spectra of brain regions 24 hours after fear conditioning (conditioned, day 3). LFP recordings (1 amygdala and 1 CPU from 1 *Stxbp1*<sup>+/-</sup> mouse) were excluded from the analysis due to recording problems (B, C).

**(D)** Group analysis of freezing before tone presentations 24 hours after fear conditioning (Fig.3C, 0–180 sec). *t*-test,  $t_{18} = 0.9075$ ,  $p = 0.3761$ .

**(E)** Regional beta band activity (10–30 Hz) before tone presentations 24 hours after fear conditioning (related to Fig. 3E–J and Supplementary Figure S3A–C). LFP recordings (1 amygdala and 1 CPU from 1 *Stxbp1*<sup>+/-</sup> mouse) were excluded from the analysis due to recording problems. WT vs. *Stxbp1*<sup>+/-</sup> mice, *t*-test, S1 ECoG:  $t_8 = 0.2307$ ,  $p = 0.8234$ ; mPFC:  $t_8 = 0.6474$ ,  $p = 0.5355$ ; CPU:  $t_7 = 1.774$ ,  $p = 0.1194$ ; BLA:  $t_7 = 1.405$ ,  $p = 0.2029$ ; VP:  $t_8 = 2.623$ , \* $p = 0.0305$ ; CA1:  $t_8 = 4.041$ , \*\* $p = 0.0037$ ; VC:  $t_8 = 1.148$ ,  $p = 0.2841$ . Two-way repeated measures ANOVA, genotype:  $F_{1,42} = 0.00$ ,  $p = 0.9895$ ; region:  $F_{6,42} = 21.11$ ,  $p < 0.0001$ ; interaction:  $F_{6,42} = 3.39$ ,  $p = 0.0081$ ; Bonferroni post-hoc test, not significant.

**(F)** Regional gamma band activity (50–70 Hz) before tone presentations 24 hours after fear conditioning (related to Fig. 3E–J and Supplementary Figure S3A–C). LFP recordings (1 amygdala and 1 CPU from 1 *Stxbp1*<sup>+/-</sup> mouse) were excluded from the analysis due to recording problems. WT vs. *Stxbp1*<sup>+/-</sup> mice, *t*-test, S1 ECoG:  $t_8 = 0.1343$ ,  $p = 0.8965$ ; mPFC:  $t_8 = 1.531$ ,  $p = 0.1643$ ; CPU:  $t_7 = 0.3250$ ,  $p = 0.7547$ ; BLA:  $t_7 = 1.607$ ,  $p = 0.1520$ ; VP:  $t_8 = 3.306$ , \* $p = 0.0108$ ; CA1:  $t_8 = 1.394$ ,  $p = 0.2009$ ; VC:  $t_8 = 1.549$ ,  $p = 0.1599$ . Two-way repeated measures ANOVA, genotype:  $F_{1,42} = 0.00$ ,  $p = 0.9958$ ; region:  $F_{6,42} = 32.54$ ,  $p < 0.0001$ ; interaction:  $F_{6,42} = 1.79$ ,  $p = 0.1246$ ; Bonferroni post-hoc test, not significant.

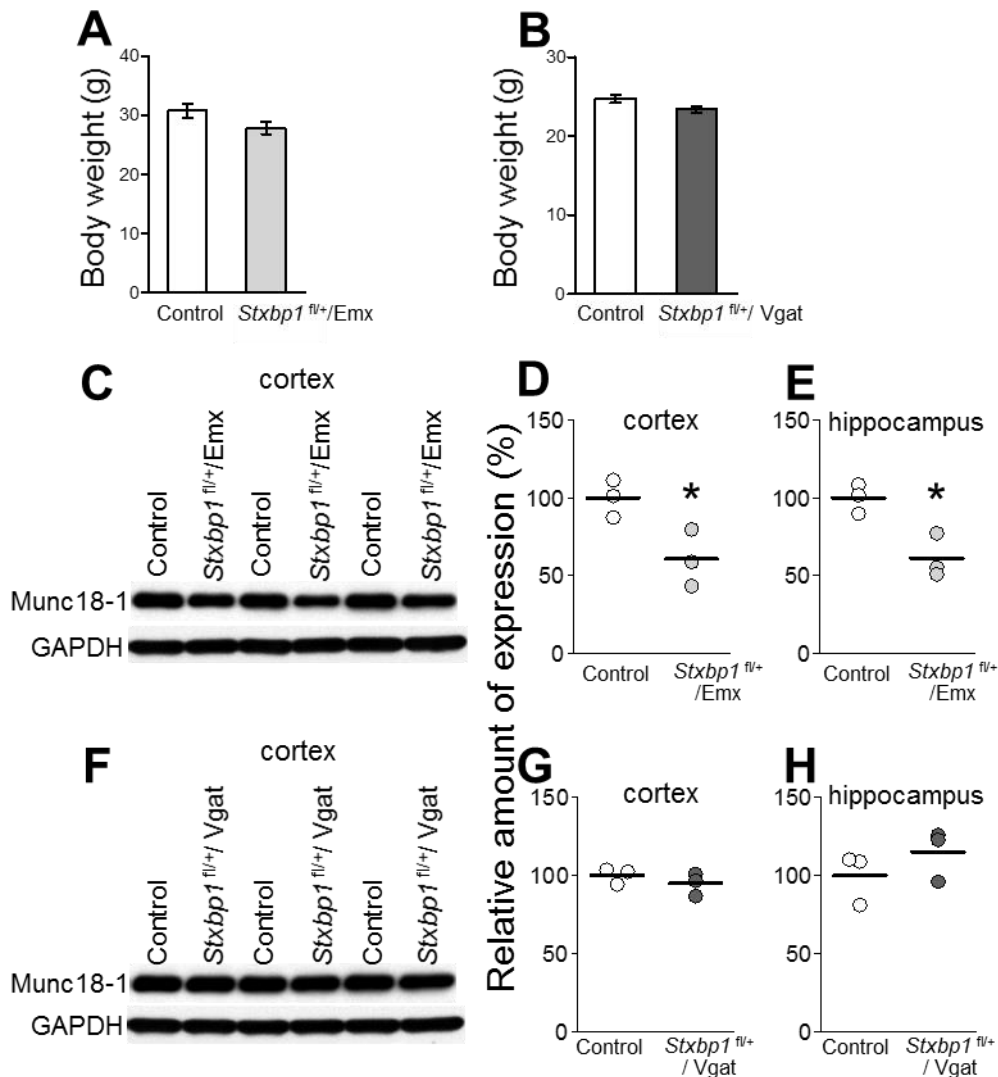

### Supplementary Figure S3. Munc18-1 expressions in *Stxbp1* conditional knockout mice

(A) Body weights of *Stxbp1*<sup>fl/+</sup>/Emx ( $n = 6$ ) and control (5 *Stxbp1*<sup>fl/+</sup> and 1 *Stxbp1*<sup>+/+</sup>/Emx,  $n = 6$ ) mice (3 months of age). There is no statistically significant difference between genotypes ( $t_{10} = 1.791$ ,  $p = 0.1036$ ). *Emx1*-Cre is specifically expressed in dorsal-telencephalic excitatory neurons, namely in the cerebral cortex, hippocampus, amygdala, and olfactory bulb, but not the basal ganglia and thalamus (25,26). *Vgat*-Cre is specifically expressed in global inhibitory neurons (26).

(B) Body weights of *Stxbp1*<sup>fl/+</sup>/Vgat ( $n = 8$ ) and control (*Stxbp1*<sup>fl/+</sup>,  $n = 8$ ) mice (2 months of age). There is no statistically significant difference between genotypes ( $t_{14} = 2.028$ ,  $p = 0.0620$ ).

(C–E) Western blots of cerebral cortex samples of *Stxbp1*<sup>fl/+</sup>/Emx ( $n = 3$ ) and control (2 *Stxbp1*<sup>fl/+</sup>, 1 *Stxbp1*<sup>+/+</sup>/Emx,  $n = 3$ ) mice (3–4 months of age) probed with anti-Munc18-1 or anti-GAPDH antibodies (C). Quantification of Munc18-1 protein expression in the neocortex (D) and the hippocampus (E). Control vs. *Stxbp1*<sup>fl/+</sup>/Emx mice, *t*-test, cortex:  $t_4 = 3.116$ ,  $*p = 0.0357$ ; hippocampus:  $t_4 = 3.970$ ,  $*p = 0.0165$ .

(F–H) Western blots of cerebral cortex samples of *Stxbp1*<sup>fl/+</sup>/*Vgat* ( $n=3$ ) and control (1 WT, 1 *Stxbp1*<sup>fl/+</sup>, 1 *Stxbp1*<sup>+/+</sup>/*Vgat*,  $n=3$ ) mice (3 months of age) probed with anti-Munc18-1 or anti-GAPDH antibodies (F). Quantification of Munc18-1 protein expression in the neocortex (G) and the hippocampus (H). Control vs. *Stxbp1*<sup>fl/+</sup>/*Vgat* mice, *t*-test, cortex:  $t_4 = 1.026$ ,  $p = 0.363$ ; hippocampus:  $t_4 = 1.107$ ,  $p = 0.3302$ .

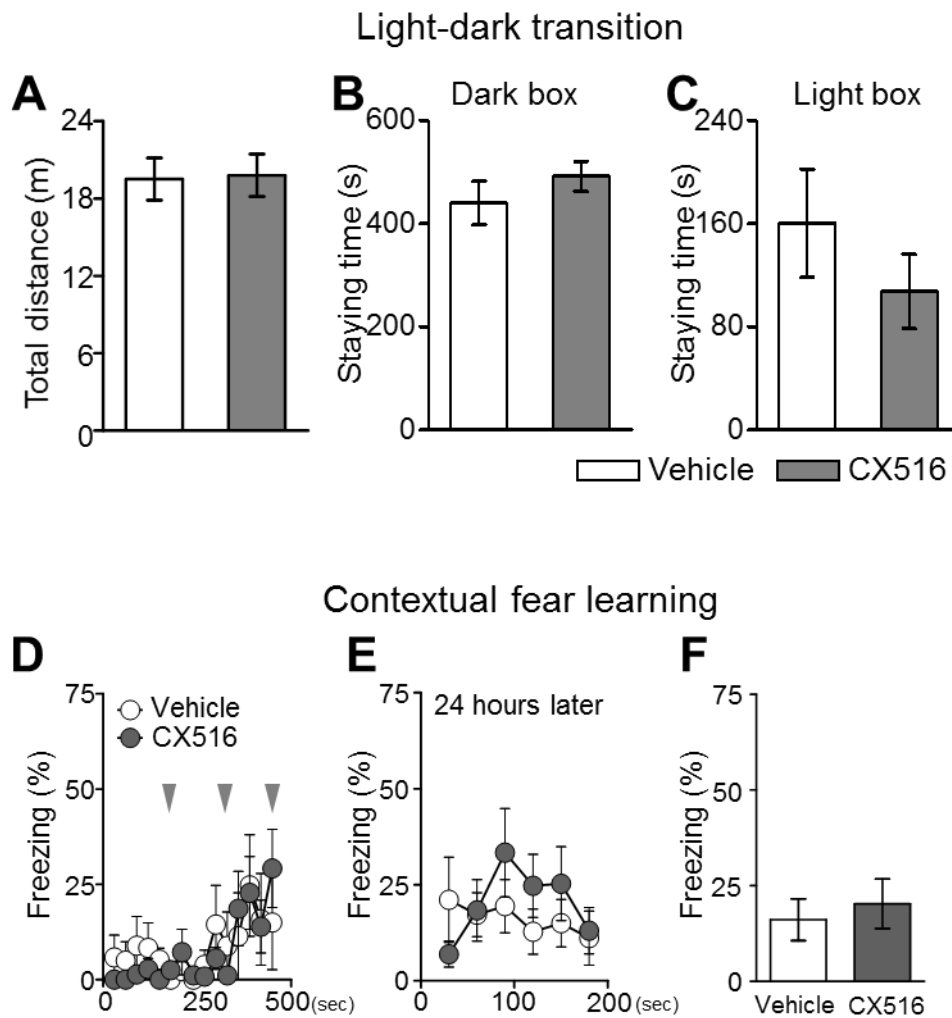

**Supplementary Figure S4. The effects of CX516 on anxiety and fear learning in *Stxbp1*<sup>+/-</sup> mice**

(A–C) The effect of CX516 on light-dark transition test in *Stxbp1*<sup>+/-</sup> (vehicle:  $n = 6$ , CX516:  $n = 6$ ) male mice (2–3 months of age). Total distances traveled (A) ( $t$ -test,  $t_{10} = 0.1234$ ,  $p = 0.9043$ ), time spent in the dark box (B) ( $t$ -test,  $t_{10} = 1.008$ ,  $p = 0.3373$ ) and the light box (C) ( $t$ -test,  $t_{10} = 1.032$ ,  $p = 0.3263$ ) did not differ significantly between vehicle and CX516 group. Vehicle or CX516 (40 mg/kg) was intraperitoneally given 10 min before the test.

(D–F) The effect of CX516 on contextual fear memory test in *Stxbp1*<sup>+/-</sup> (vehicle:  $n = 6$ , CX516:  $n = 6$ ) male mice (2–3 months of age). Conditioned fear responses (D), fear expression 24 hours after fear conditioning (E) did not differ between vehicle and CX516 group. Two-way repeated measures ANOVA, vehicle vs. CX516, conditioning:  $F_{1,140} = 0.05$ ,  $p = 0.8330$ ; testing:  $F_{1,50} = 0.24$ ,  $p = 0.6325$ . Averaged freezing time expressed as percent of recording time (30-sec bin). (F) Averaged freezing time (%) during the test, vehicle vs. CX516,  $t$ -test,  $t_{10} = 0.4933$ ,  $p = 0.6325$ . Vehicle or CX516 (40 mg/kg) was intraperitoneally given 10 min before the fear conditioning (D).

**Supplementary Movie S1**

Resident-intruder test of a male *Stxbp1*<sup>+/-</sup> mouse (5 months old, housed individually over one week, black). Vehicle (150  $\mu$ L saline) was intraperitoneally injected 10 min before the test. A male, white BALB/c mouse (5 weeks) was introduced to the resident's home cage as an intruder just after starting the recording (movie length: 24 sec).

**Supplementary Movie S2**

Resident-intruder test of the same *Stxbp1*<sup>+/-</sup> mouse (Supplementary Movie 1) on the next day. CX516 (100 mg/kg) was intraperitoneally injected 10 min before the test. No aggressive behavior was observed (movie length: 59 sec).

**Supplementary Movie S3**

One hundred minutes after CX516 injection, the *Stxbp1*<sup>+/-</sup> mouse recovered their aggressiveness (movie length: 36 sec).
